# Supplementary material for: Self-management support program delivered in the sub-acute phase after traumatic injury—study protocol for a pragmatic randomized controlled trial
Source: Springer Nature journal article supplement (doi:10.1186/s13063-024-08492-0), 2024-09-30
Supplement: MOESM3 [file 13063_2024_8492_MOESM3_ESM.pdf]

To whom it may concern

**Oslo University Hospital**

Postal address:  
Trondheimsveien 235  
NO-0514 Oslo  
Norway

Switchboard:  
+47 915 02770

Org.number:  
NO 993 467 049 MVA

[www.oslo-universitetssykehus.no](http://www.oslo-universitetssykehus.no)

Date: 22<sup>nd</sup> of April 2024

### **Proof of funding**

This is to confirm that Nada Hadzic-Andelic is employed at the Oslo University Hospital HF, and has received a research grant from the South-Eastern Norway Regional Health Authority (HSØ), amounting to NOK 8 775 000,- from 1<sup>st</sup> of January 2023 and for the duration of three years. The project title is; "Managing symptoms and disability in the sub-acute phase after traumatic injury - A pragmatic randomized controlled trial of a self-management support program"

Please do not hesitate to contact me should there be any questions or further information needed.



Administrativt ansvarlig/Prosjektadministrator/Project  
Administrator/Authorized Representative

Martin Sending  
Head of department  
Administrative Research Support  
Research Support Unit - Oslo Hospital Service  
Oslo University Hospital
